# Supplementary material for: Platelet GPIIb supports initial pulmonary retention but inhibits subsequent proliferation of melanoma cells during hematogenic metastasis
Source: PubMed Central journal article supplement (PMC5333841; doi:10.1371/journal.pone.0172788), 2017-03-02

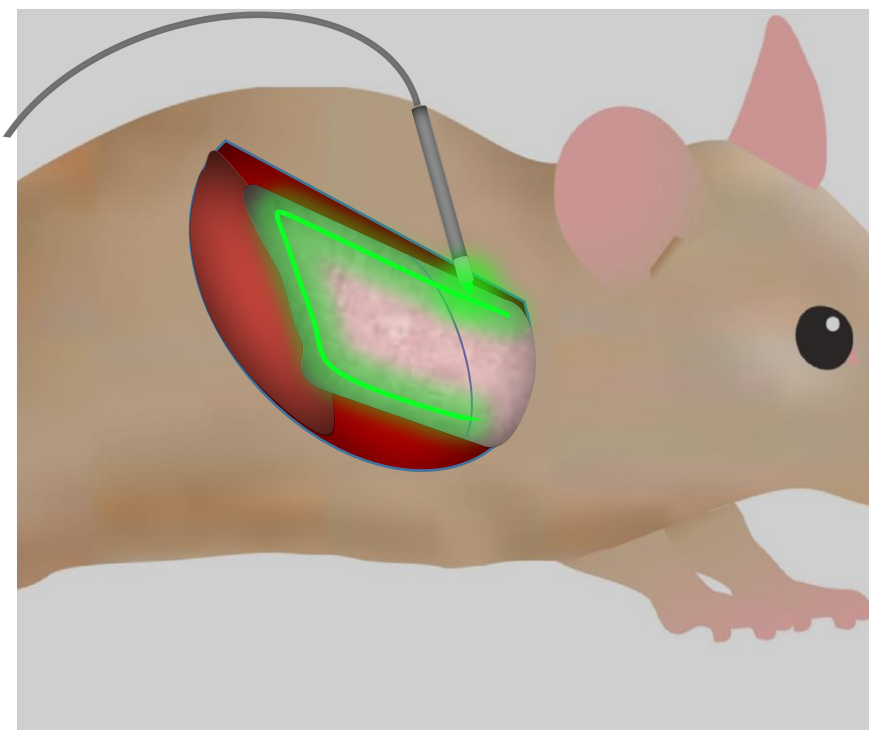

Supplement: pone.0172788.s003.pdf [file pone.0172788.s003.pdf]
